# Supplementary material for: Novel enhancement mechanism of tyrosine hydroxylase enzymatic activity by nitric oxide through S-nitrosylation
Source: PubMed Central journal article supplement (PMC5347018; doi:10.1038/srep44154), 2017-03-13

**Novel enhancement mechanism of tyrosine hydroxylase enzymatic activity by nitric oxide through S-nitrosylation**

by

Yuanyuan Wang, Chun Chau Sung and Kenny K. K. Chung

Division of Life Science, State Key Laboratory of Molecular Neuroscience, The Hong Kong University of Science and Technology, Hong Kong, China.

Correspondence should be addressed to: Kenny K.K. Chung, Division of Life Science, The Hong Kong University of Science and Technology, Clear Water Bay, Hong Kong, China. Phone: + 852 2358 8019, Fax: + 852 2358 1552, Email: [bckchung@ust.hk](mailto:bckchung@ust.hk)

## Supplementary information

Fig. S1. Estimation of percentage of S-nitrosylation in *in vitro* and *in vivo* samples. In the *in vitro* (A) and *in vivo* (B) biotin switch assay, the supernatant before and after Neutraavidin-agarose beads S-nitrosylated protein pull-down were analyzed by Western blotting. The density of the bands were quantified by Image J. The percentage of S-nitrosylated proteins were estimated by comparing the TH protein before and after pull-down. Figure S1 A-B included cropped images and the original blot images are included in the Supplementary Information file.

Table 1. The estimated percentage of TH S-nitrosylation *in vitro*

| GSH         | GSNO       | GSNO       | GSNO        | GSNO        | GSNO        |
|-------------|------------|------------|-------------|-------------|-------------|
| 200 $\mu$ M | 10 $\mu$ M | 50 $\mu$ M | 100 $\mu$ M | 200 $\mu$ M | 400 $\mu$ M |
| 7%          | 4%         | 16%        | 23%         | 24%         | 27 %        |

Table 2. The estimated percentage of TH S-nitrosylation *in vivo*

| APO | APO |
|-----|-----|
| -   | +   |
| 9%  | 15% |

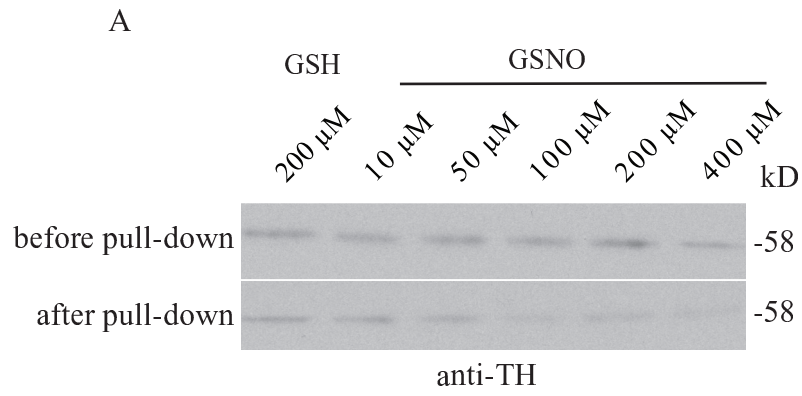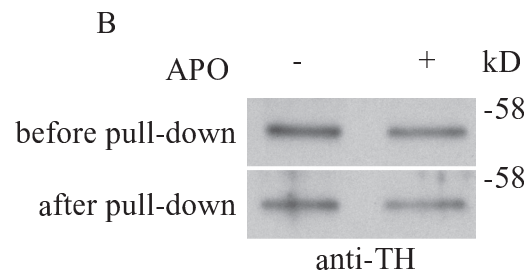

Fig S1

Original blot images of Figure 1 A-E, Figure 2 A-D, Fig 4 A-D, Figure 5 A-C, Figure 6 A&B and Figure S1 A&B

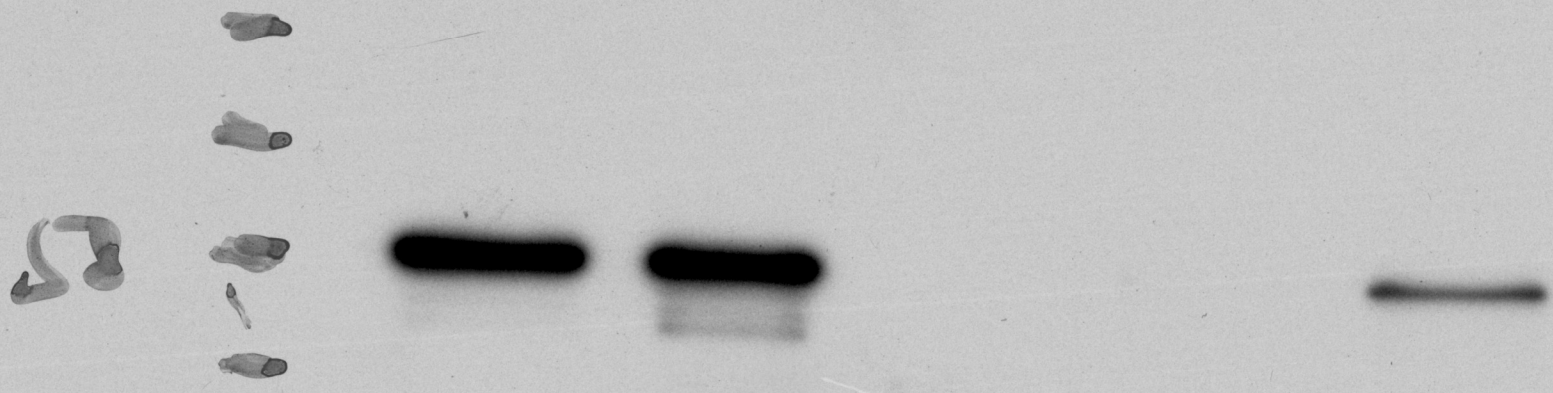

TH. 293T overexpress  
B. S. A.

input

H W

pull down

H W

1  
1  
1  
1  
1  
1  
1

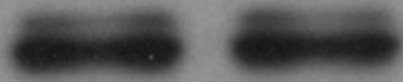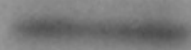

ctrl no. 5





2  
r

|   |   |   |   |   |   |   |   |
|---|---|---|---|---|---|---|---|
| - | - | + | + | + | - | + | + |
| - | + | - | + | + | + | - | + |

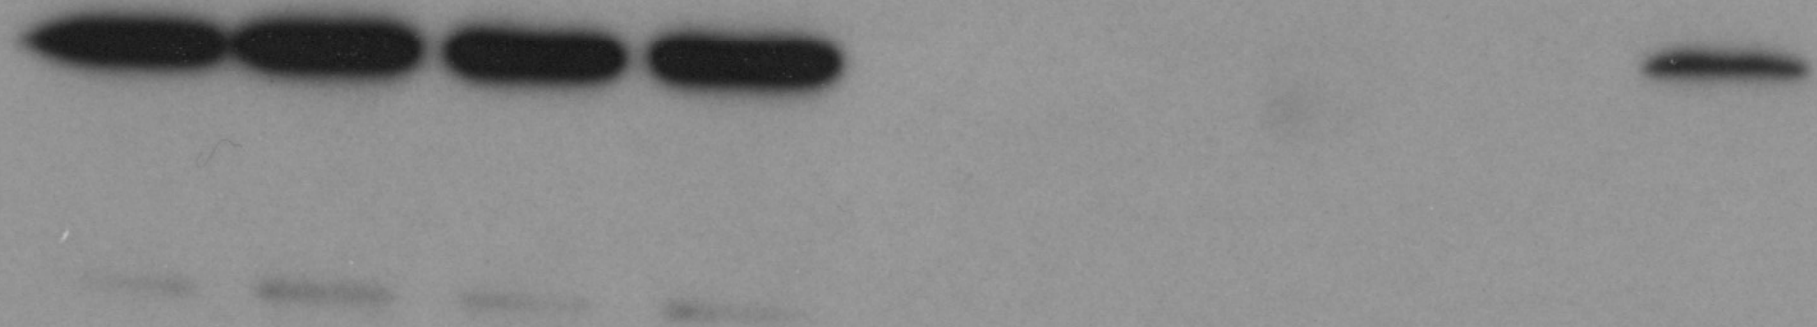



T  
do  
c  
hi

|   |   |   |   |   |   |   |   |   |   |   |   |
|---|---|---|---|---|---|---|---|---|---|---|---|
| + | - | - | - | - | - | + | + | - | - | - | - |
| - | + | - | - | - | - | + | + | - | - | - | - |
| + | + | - | - | + | + | + | + | - | - | + | + |
| + | + | - | + | - | + | + | + | - | + | - | + |

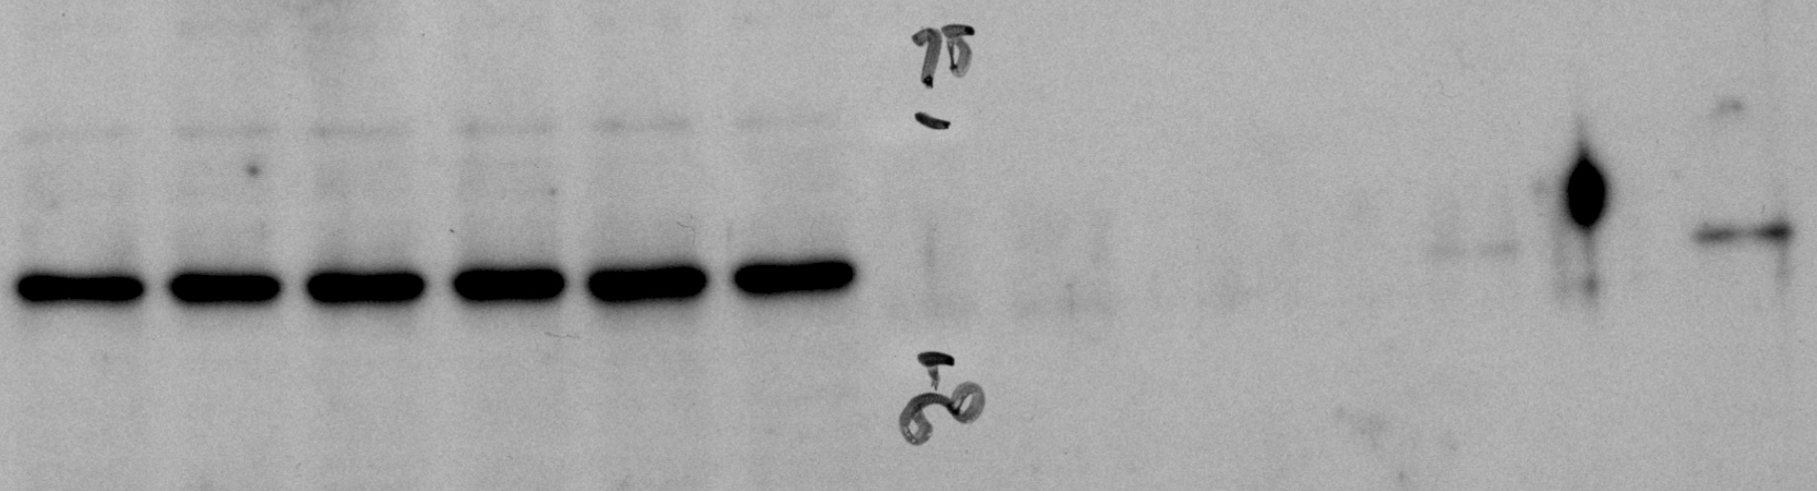

Input

pull down

250  
100  
75  
50

-  
-  
-  
-  
-

Ctrl

H

M

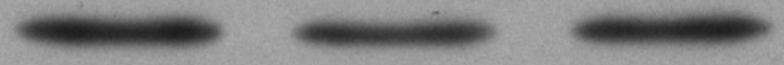

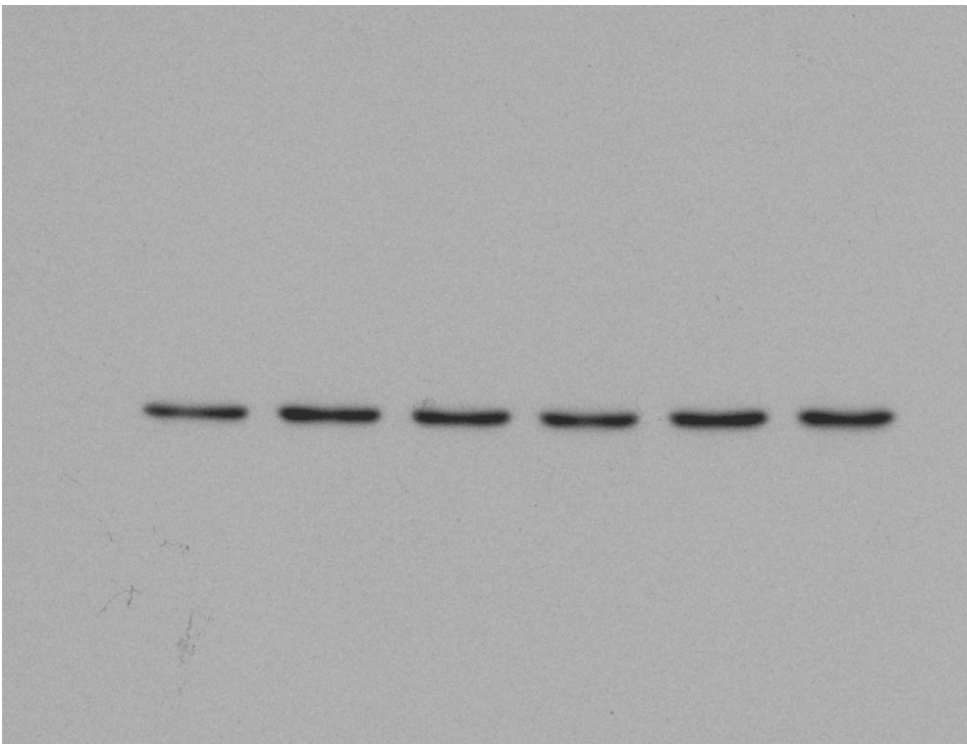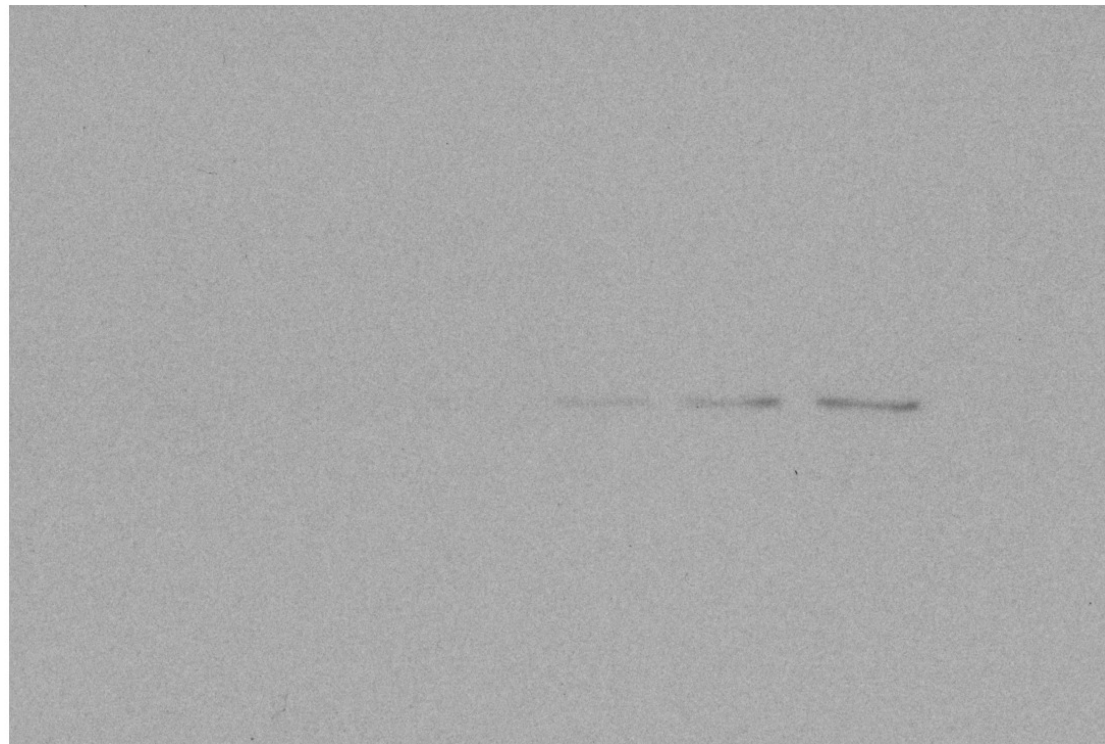



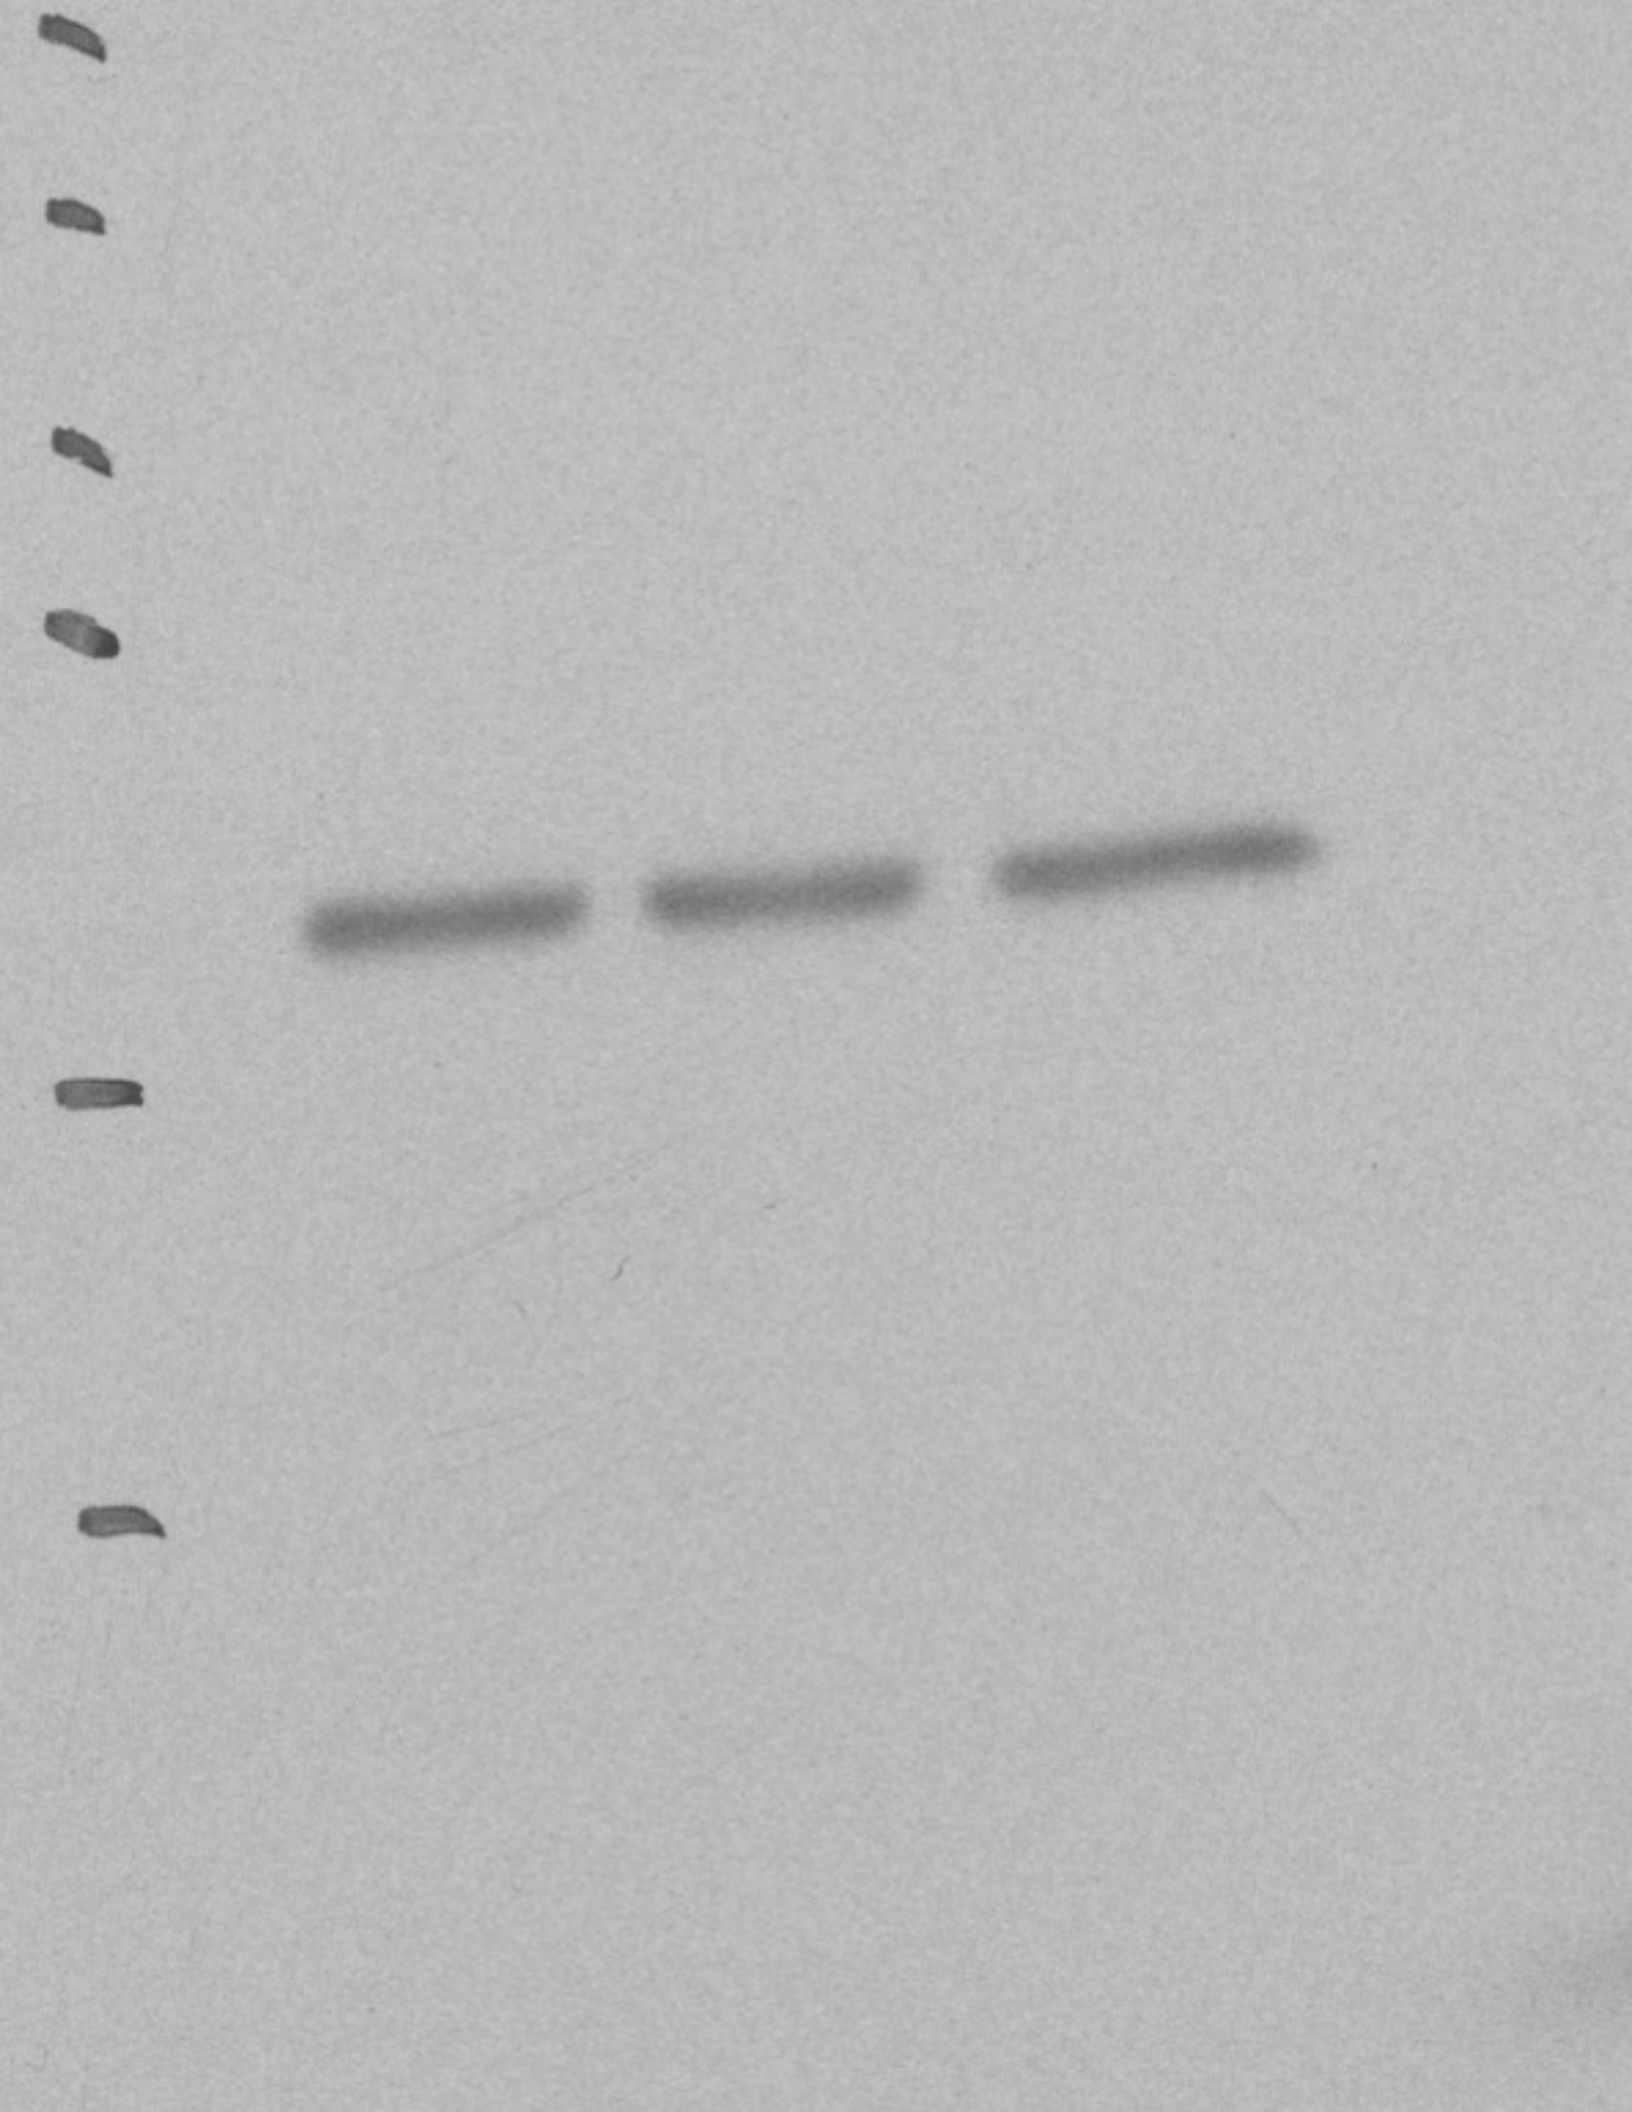

ETM

Striatum lysate  
ETC

WT                  M1                  M2  
H NO   H NO   H NO   H NO

1  
2  
3  
4  
5  
6  
7

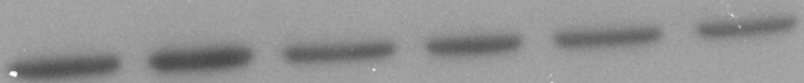

FUT                  M1                  M2  
H NO   H NO   H NO

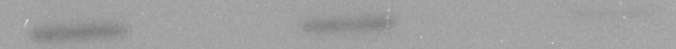

75

80

-

-

-

-

-

-

—————



WT  
H NO

MZ  
H MO

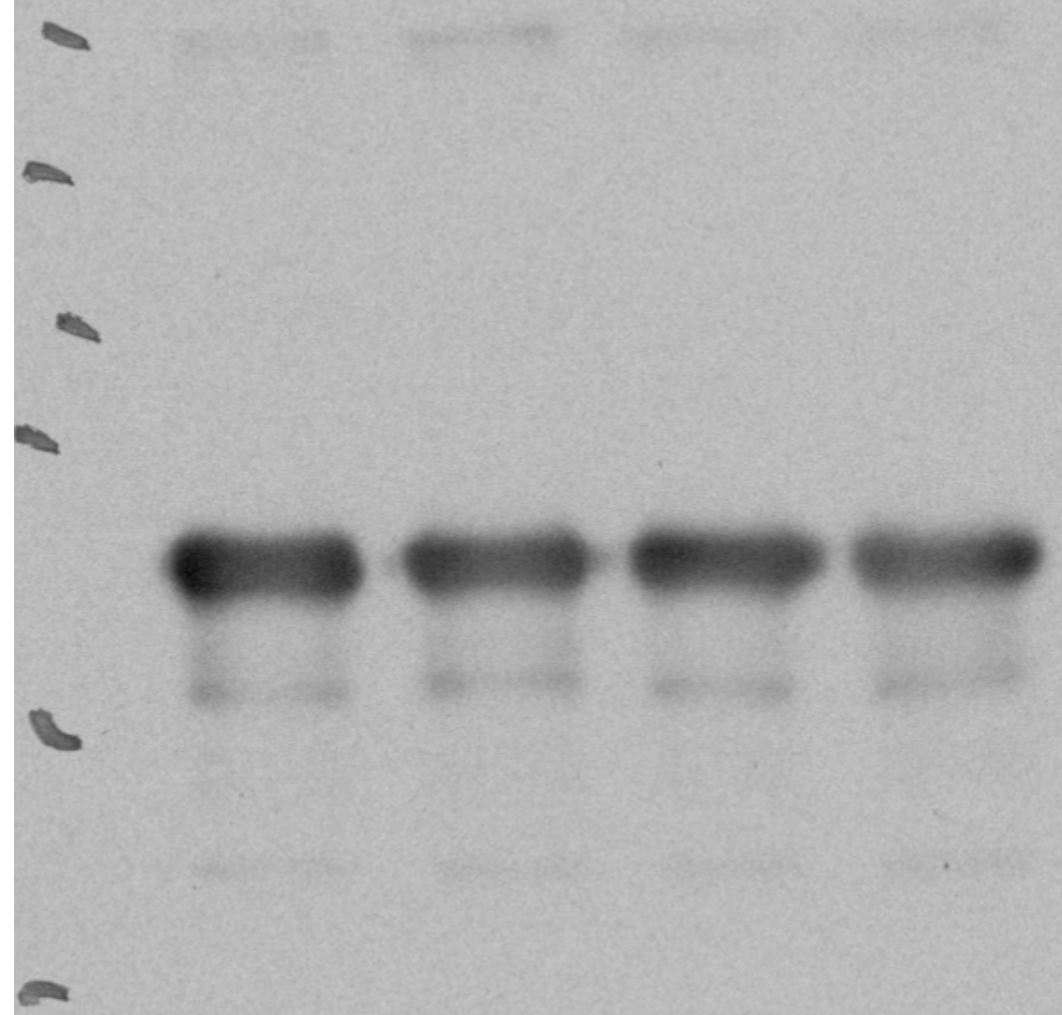

WT  
H NO

M2H  
H NO

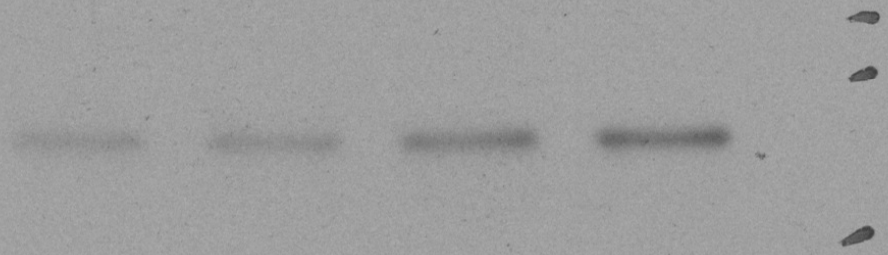

WT  
H NO

M2H  
H NO

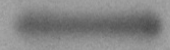

Ctrl

APP  
in pres

—

—

—

—

Ctrl

Pres  
APP

—

—

Striatum  
ctrl Apo

175

-

150

-

100

-

75

-

50

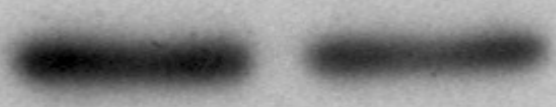



CON

APP

— —

75

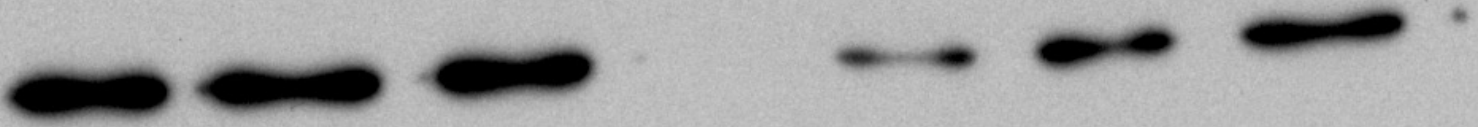

9





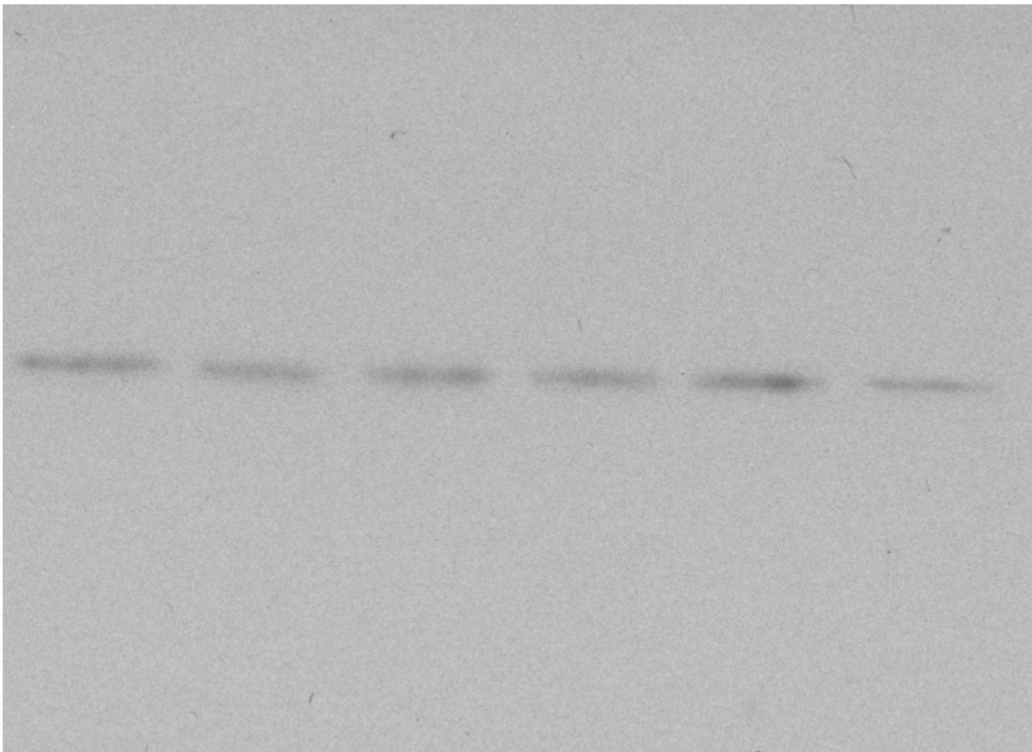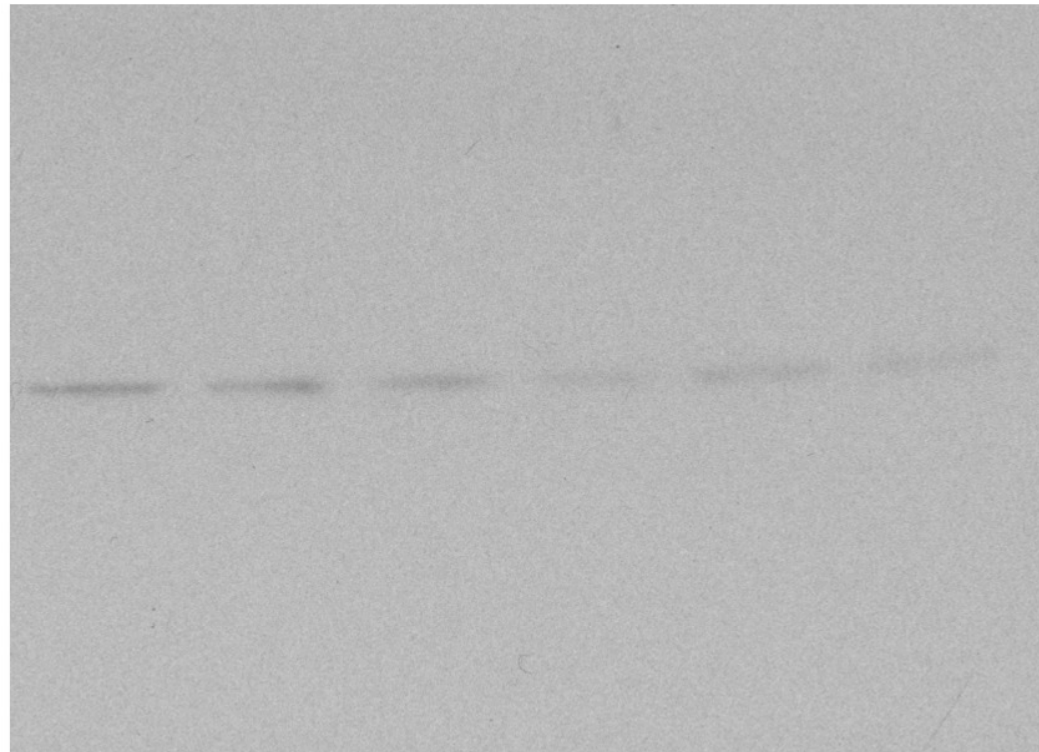

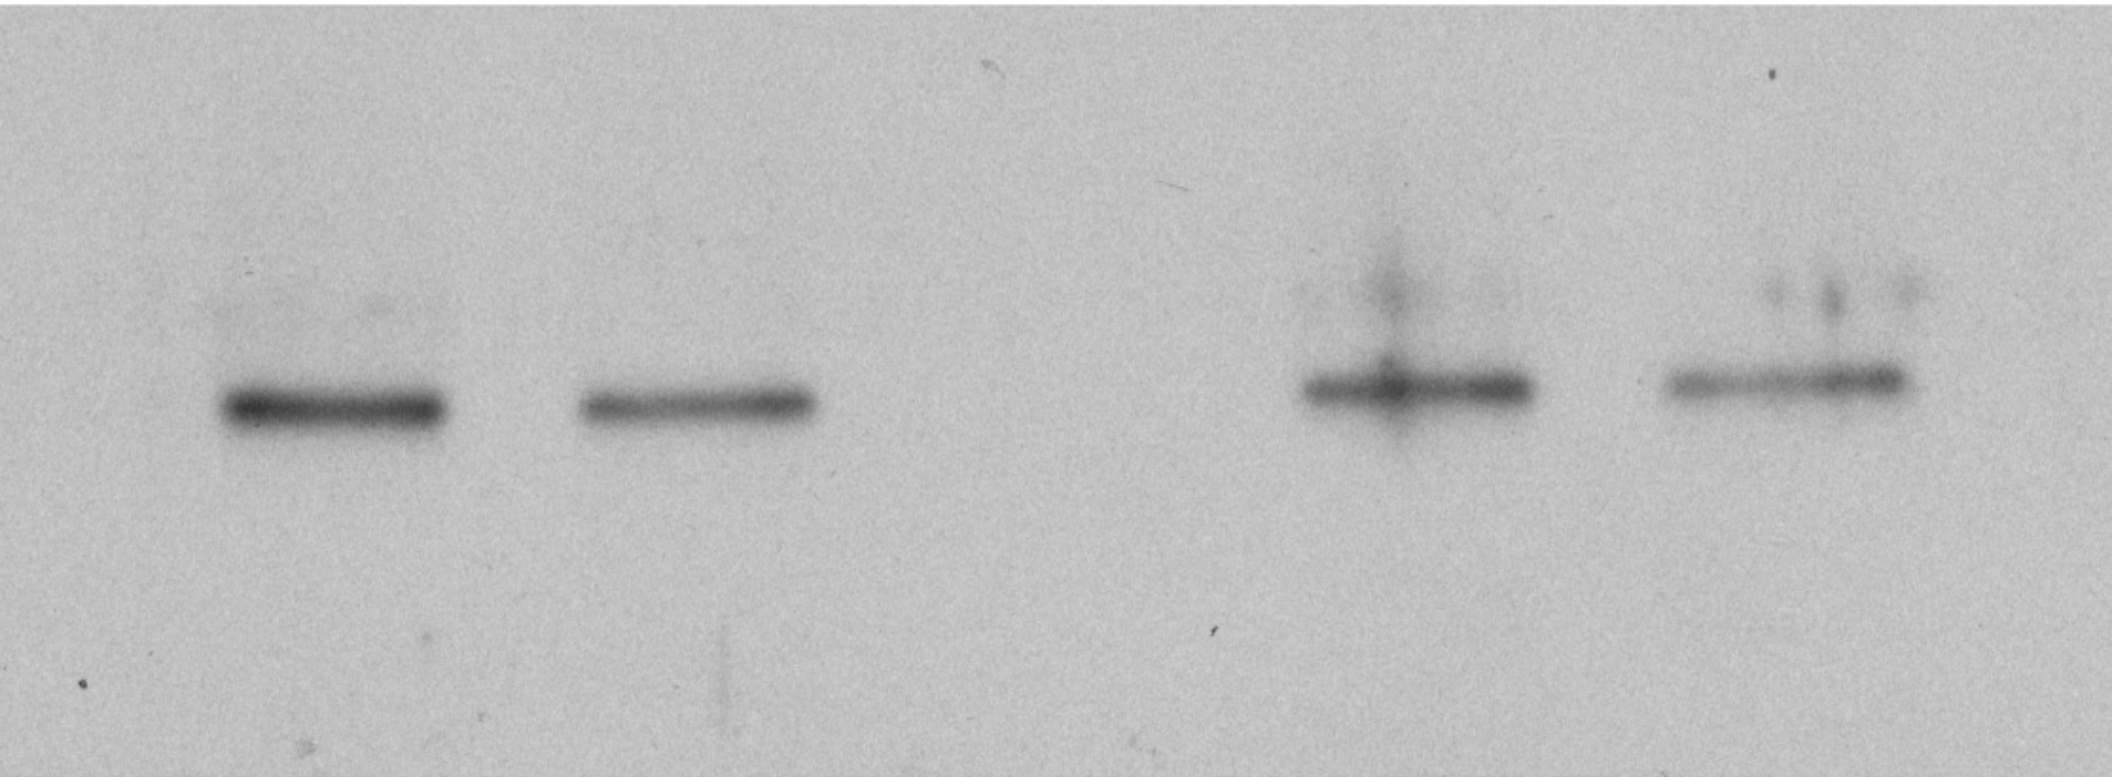

Supplement: srep44154-s1.pdf [file srep44154-s1.pdf]
